# Supplementary material for: Elucidating the Molecular Mechanisms for the Interaction of Water with Polyethylene Glycol-Based Hydrogels: Influence of Ionic Strength and Gel Network Structure
Source: MDPI journal article supplement (doi:10.3390/polym13060845), 2021-03-10
Supplement: s1 [file s1]

Supporting Information

# Elucidating the Molecular Mechanisms for the Interaction of Water with Polyethylene Glycol-based Hydrogels: Influence of Ionic Strength and Gel Network Structure

Xin Yang, Bronwin L. Dargaville and Dietmar W. Hutmacher \*

Centre for Transformative Biomimetics in Bioengineering, Queensland University of Technology, 60 Musk Avenue, Kelvin Grove QLD 4059, Australia, x48.yang@hdr.qut.edu.au (X.Y.); bronwin.dargaville@qut.edu.au (B.L.D.)

\* Correspondence: Dietmar.hutmacher@qut.edu.au

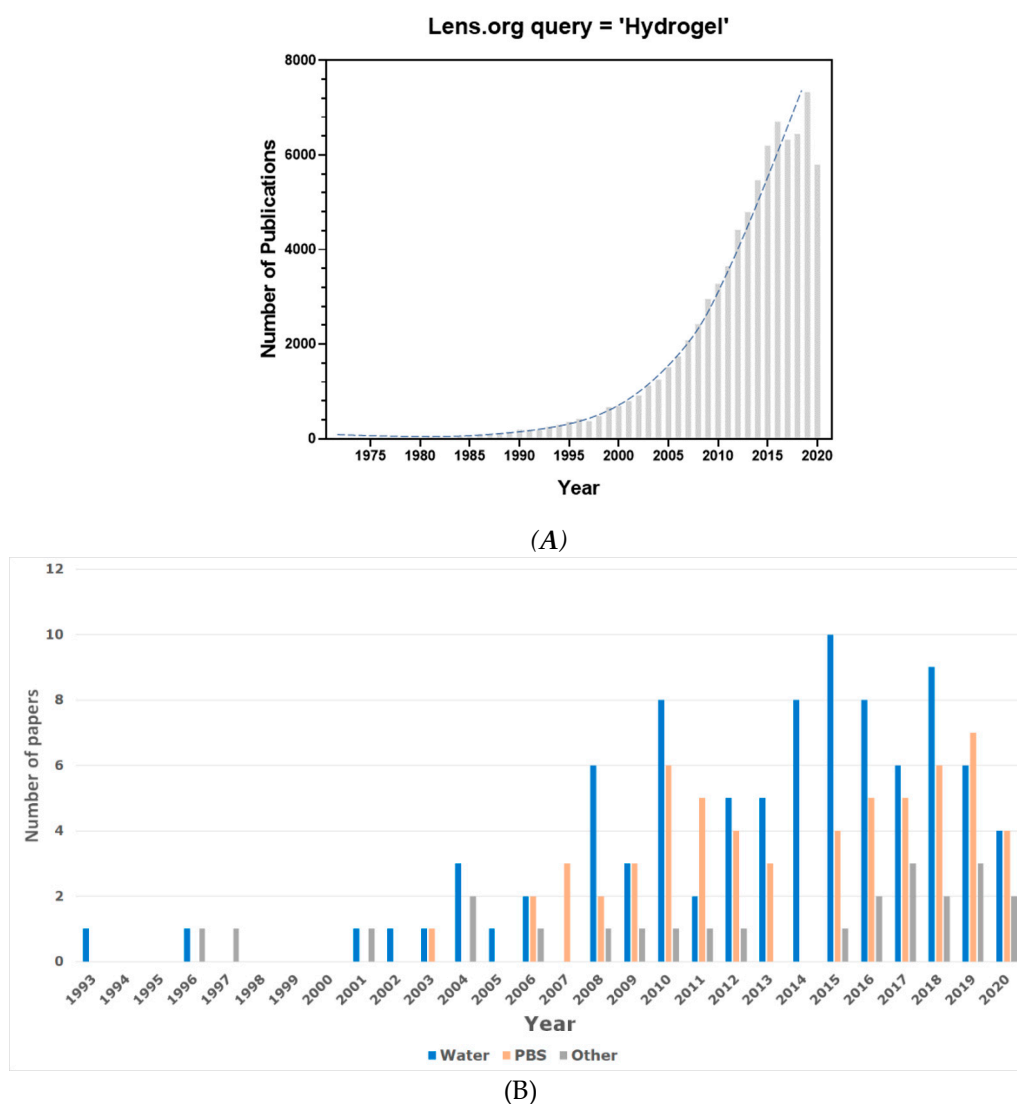

**Figure S1.** **A.** Number of publications related to the keyword “hydrogel” since the nineteen sixties. **B.** Published papers on the topic of swelling of PEGDA hydrogels from 1993 to the present. Papers focussing on swelling in water, PBS or other media are displayed separately. Data source: Lens.org.

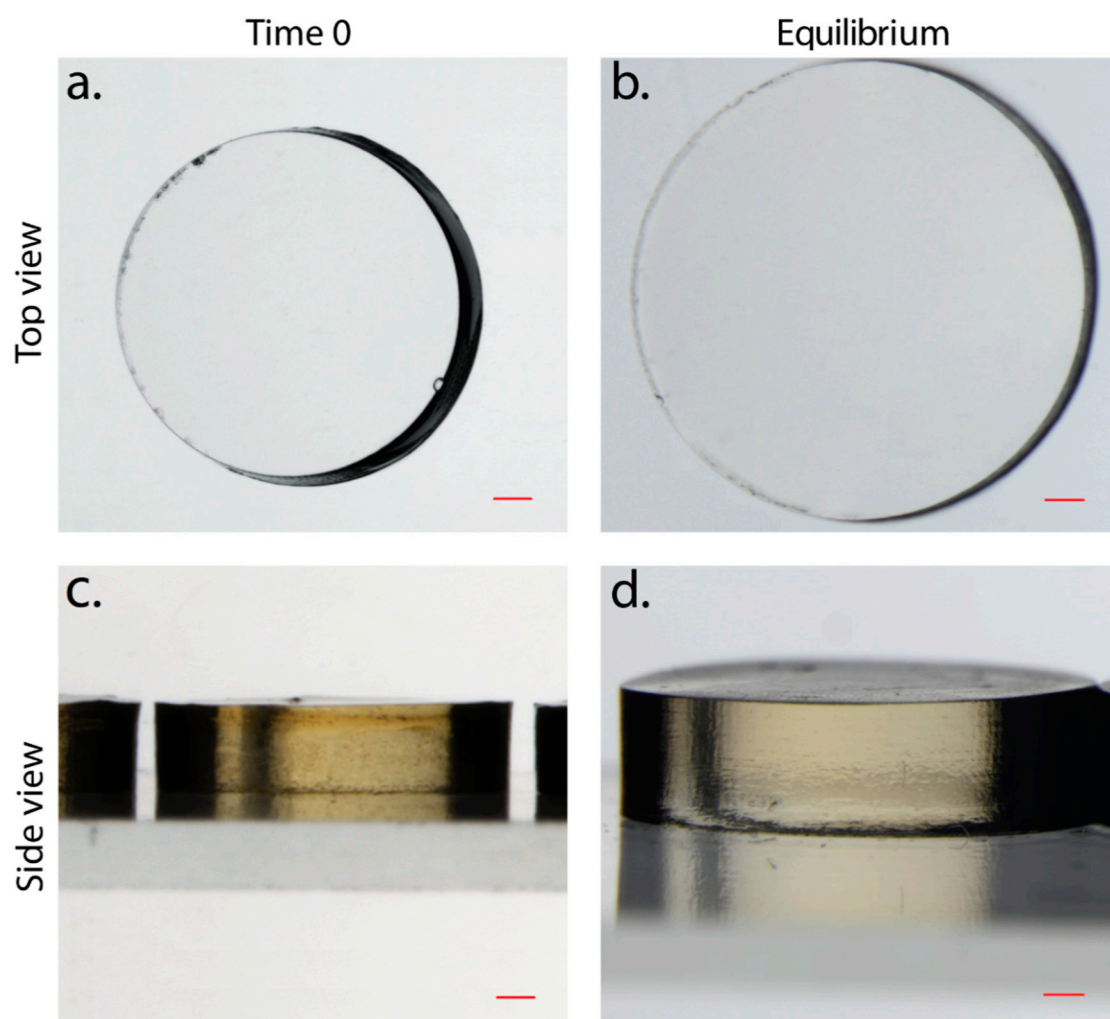

**Figure S2.** Optical microscopy photos of initial (a,c) and equilibrium state (b,d) of PEGDA 10 k, 20 wt%, crosslinked and swelled in ultrapure water.

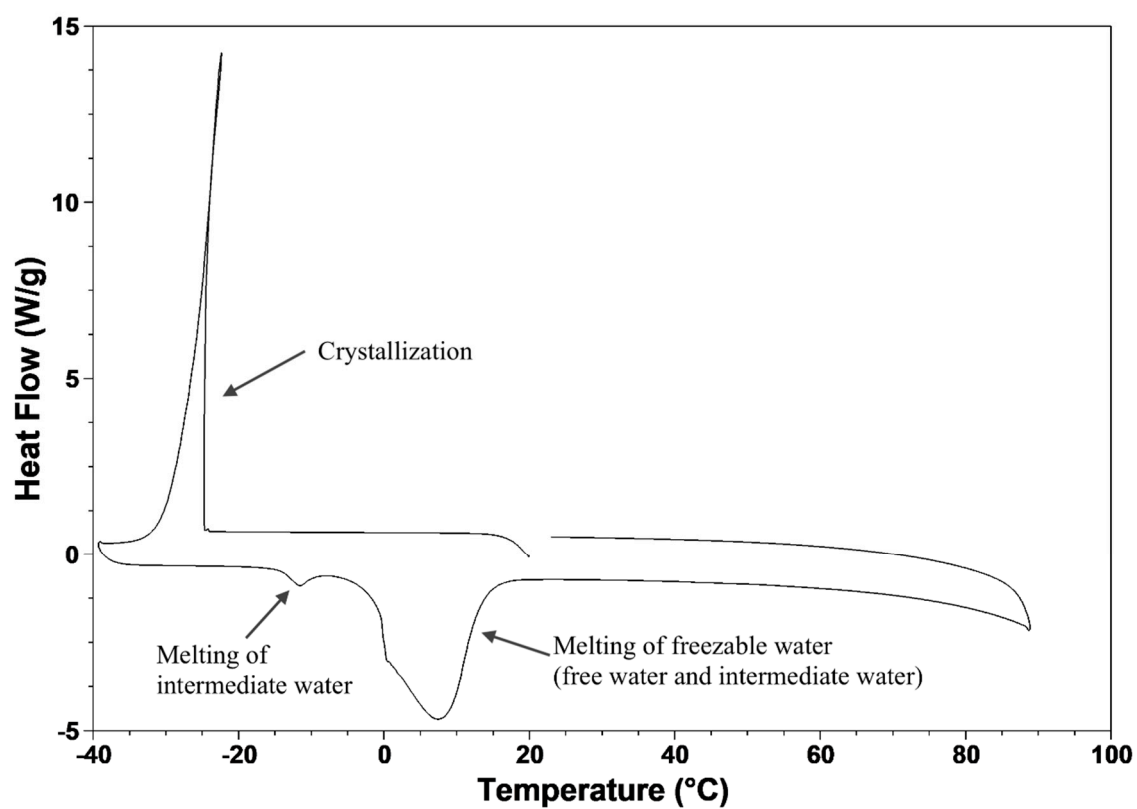

**Figure S3.** Differential scanning calorimetry (DSC) thermogram of 30% 20 k PEGDA crosslinked in PBS and swelled in water.

**Table 1.** Hydrogel composition and media conditions for crosslinking and swelling (n = 5).

| Polymer                      | PEGDA (10 k or 20 k) |    |    |    |                     |    |    |    |                     |    |    |    |                     |    |    |    |
|------------------------------|----------------------|----|----|----|---------------------|----|----|----|---------------------|----|----|----|---------------------|----|----|----|
| Conc.of PEGDA<br>(wt/wt) (%) | 10                   | 15 | 20 | 30 | 10                  | 15 | 20 | 30 | 10                  | 15 | 20 | 30 | 10                  | 15 | 20 | 30 |
| Crosslinking<br>solvent      | PBS                  |    |    |    | Ultra-pure<br>water |    |    |    | PBS                 |    |    |    | Ultra-pure<br>water |    |    |    |
| Swelling medium              | PBS                  |    |    |    | PBS                 |    |    |    | Ultra-pure<br>water |    |    |    | Ultra-pure<br>water |    |    |    |
